# Supplementary material for: The establishment of species-specific primers for the molecular identification of ten stored-product psocids based on ITS2 rDNA
Source: Springer Nature journal article supplement (doi:10.1038/srep21022), 2016-02-16
Supplement: 41598_2016_BFsrep21022_MOESM16_ESM.pdf [file 41598_2016_BFsrep21022_MOESM16_ESM.pdf]

1 The establishment of species-specific primers for the molecular identification of ten  
2 stored-product psocids based on ITS2 rDNA

3

4 Zi-Hua Zhao<sup>1,§</sup>, Bing-Yi Cui<sup>1,§</sup>, Zhi-Hong Li<sup>1,\*</sup>, Fan Jiang<sup>1, 5</sup>, Qian-Qian Yang<sup>1,6</sup>,  
5 Zuzana Kučerová<sup>2</sup>, Václav Stejskal<sup>2</sup>, George Opit<sup>3</sup>, Yang Cao<sup>4</sup>, Fu-Jun Li<sup>4</sup>

6

7 <sup>1</sup> Department of Entomology, College of Plant Protection, China Agricultural  
8 University, Beijing 100193, China;

9 <sup>2</sup> Crop Research Institute, Drnovská 507, 161 06 Prague 6, Czech Republic;

10 <sup>3</sup> Department of Entomology and Plant Pathology, 127 Noble Research Center,  
11 Oklahoma State University, Stillwater, OK 74078, USA;

12 <sup>4</sup> Academy of State Administration of Grain, Beijing 100037, China;

13 <sup>5</sup> Institute of Plant Quarantine Research, Chinese Academy of Inspection and  
14 Quarantine, Beijing 100176, China;

15 <sup>6</sup> College of Life Science, China Jiliang University, Hangzhou 310018, China;

16

---

<sup>§</sup>These two authors (Zi-Hua Zhao and Bing-Yi Cui) contributed equally to this research.

Address: No. 2 Yuanmingyuan West Road, Haidian District, Beijing 100193, China

\*Corresponding author: [lizh@cau.edu.cn](mailto:lizh@cau.edu.cn) (Zhi-Hong Li)

17 **Supplement Material Appendix**

18 **Table S1** The primers for the ITS2 gene amplification of 10 stored-product psocids

19 **Table S2** The ITS2 gene sequence of 10 stored-product psocids (The sequences  
20 highlighted in red indicate species-specific primers for ten stored-product psocids)

21 **Table S3** The number of 53 specific sequences submitted to Genebank

22 **Figure S1** The electrophoresis strip for specificity estimation of species-specific  
23 primers (LBF and LBR) of *L. bostrychophila* (M: D2000 DNA Marker; 1: *L.*  
24 *bostrychophila* (Guangxi); 2: *L. bostrychophila* (Henan); 3: *L. bostrychophila*  
25 (Chongqing); 4: *L. bostrychophila* (Berlin); 5: *L. bostrychophila* (USA); 6: *L.*  
26 *bostrychophila* (Prague); 7 *L. bostrychophila* (Beijing); 8: *L. bostrychophila*  
27 (Guangzhou); 9: *L. entomophila* (Shandong); 10: *L. decolor* (Yunnan); 11: *L. paeta*  
28 (Zhejiang); 12: *L. corrodens* (USA); 13: *L. brunnea* (Prague); 14: *L. rufa* (USA); 15:  
29 *L. pearmani* (USA); 16: *L. mendax* (Jiangsu); 17: *L. tricolor* (Shandong); CK:  
30 Negative control)

31 **Figure S2** The electrophoresis strip for specificity estimation of species-specific  
32 primers (21LEnF and 208LEnR-2) of *L. Entomophila* (M: DNA Marker II; 1: *L.*  
33 *entomophila* (Beijing); 2: *L. entomophila* (Guangxi); 3: *L. entomophila* (Prague); 4: *L.*  
34 *entomophila* (Chongqing); 5: *L. bostrychophila* (Guangxi); 6: *L. bostrychophila*  
35 (Yunnan); 7: *L. Decolor* (Yunnan); 8: *L. corrodens* (USA); 9: *L. brunnea* (Prague); 10:  
36 *L. rufa* (USA); 11: *L. pearmani* (USA); 12: *L. mendax* (Jiangsu); 13: *L.*  
37 *tricolor*(Shandong); CK: Negative control)

38 **Figure S3** The electrophoresis strip for specificity estimation of species-specific

39 primers (164LDeF and 319LDeR) of *L. decolor* (M: DNA Marker II; 1 and 2: *L.*  
40 *Decolor* (Yunnan); 3 and 4: *L. Decolor* (Chongqing); 5: *L. Entomophila* (Shandong);  
41 6: *L. bostrychophila* (Chongqing); 7: *L. paeta* (Shandong); 8: *L. corrodens* (USA); 9:  
42 *L. Brunnea* (Prague); 10: *L. Rufa* (USA); 11: *L. mendax* (Jiangsu); 12: *L. Pearmani*  
43 (USA); 13: *L. Tricolor* (Shandong); CK: Negative control)

44 **Figure S4** The electrophoresis strip for specificity estimation of species-specific  
45 primers (LPa15F and LPa180R) of *L. paeta* (M: DNA Marker II; 1: *L. paeta*  
46 (Caoxian, Shandong); 2: *L. paeta* (Taian, Shandong); 3: *L. paeta* (Zhejiang); 4: *L.*  
47 *paeta* (Hubei); 5: *L. paeta* (USA); 6: *L. entomophila* (Shandong); 7: *L. bostrychophila*  
48 (Guangxi); 8: *L. decolor* (Yunnan); 9: *L. corrodens* (Prague); 10: *L. brunnea* (USA);  
49 11: *L. Rufa* (USA); 12: *L. pearmani* (USA); 13: *L. mendax* (Jiangsu); 14: *L. tricolor*  
50 (Shandong); CK: Negative control)

51 **Figure S5** The electrophoresis strip for specificity estimation of species-specific  
52 primers (LC170F and LC277R) of *L. corrodens* (M: D2000 DNA Marker; 1: *L.*  
53 *corrodens* (Danmark); 2: *L. corrodens* (Prague); 3: *L. corrodens* (USA); 4: *L.*  
54 *entomophila* (Shandong); 5: *L. bostrychophila* (Guangzhou); 6: *L. decolor*  
55 (Chongqing); 7: *L. paeta* (Hubei); 8: *L. brunnea* (USA); 9: *L. rufa* (USA); 10: *L.*  
56 *tricolor* (Shandong); 11: 11: *L. mendax* (Jiangsu); 12: *L. pearmani* (USA); CK:  
57 Negative control)

58 **Figure S6** The electrophoresis strip for specificity estimation of species-specific  
59 primers (LBr350F and LBr577R) of *L. brunnea* (M: D2000 DNA Marker; 1: *L.*  
60 *brunnea* (Prague); 2: *L. brunnea* (USA); 3: *L. entomophila* (Beijiing); 4: *L.*

61 *bostrychophila* (Guangzhou); 5: *L. decolor* (USA); 6: *L. paeta* (Shandong); 7: *L.*  
62 *corrodens* (USA); 8: *L. rufa* (USA); 9: *L. pearmani* (USA); 10: *L. tricolor* (Shandong);  
63 11: *L. mendax* (Jiangsu); CK: Negative control)

64 **Figure S7** The electrophoresis strip for specificity estimation of species-specific  
65 primers (78LRuF-3 and 276LRuR-3) of *L. rufa* (M: D2000 DNA Marker II; 1, 2,  
66 and 3: *L. rufa* (USA); 4: *L. entomophila* (Beijing); 5: *L. bostrychophila* (Guangxi); 6:  
67 *L. decolor* (Yunnan); 7: *L. paeta* (Prague); 8: *L. corrodens* (USA); 9: *L. brunnea*  
68 (USA); 10: *L. mendax* (Jiangsu); 11: *L. pearmani* (USA); 12: *L. tricolor* (Shandong);  
69 CK: Negative control)

70

71 **Figure S8** The electrophoresis strip for specificity estimation of species-specific  
72 primers (186LPeF and 436LPeR) of *L. pearmani* (M: D2000 DNA Marker; 1 and 2: *L.*  
73 *pearmani*(USA); 3: *L. entomophila* (Beijiing); 4: *L. bostrychophila* (Guangxi); 5: *L.*  
74 *decolor* (Yunnan); 6: *L. paeta* (Prague); 7: *L. corrodens* (USA); 8: *L. brunnea* (USA);  
75 9: *L. rufa* (USA); 10: *L. mendax* (Jiangsu); 11: *L. tricolor* (Shandong); CK: Negative  
76 control)

77 **Figure S9** The electrophoresis strip for specificity estimation of species-specific  
78 primers (LM60F and LM224R) of *L. mendax* (M: D2000 DNA Marker; 1 and 2: *L.*  
79 *mendax* (Jiangsu); 3: *L. entomophila* (Beijiing); 4: *L. bostrychophila* (Guangxi); 5: *L.*  
80 *decolor* (Yunnan); 6: *L. paeta* (Prague); 7: *L. corrodens* (USA); 8: *L. brunnea* (USA);  
81 9: *L. rufa* (USA); 10: *L. pearmani* (USA); 11: *L. tricolor* (Shandong); CK: Negative  
82 control)

83 **Figure S10** The electrophoresis strip for specificity estimation of species-specific  
84 primers (LTri20F and LTri249R) of *L. tricolor* (M: D2000 DNA Marker; 1 and 2: *L.*  
85 *tricolor* (Shandong); 3: *L. entomophila* (Beijiing); 4: *L. bostrychophila* (Guangxi); 5:  
86 *L. decolor* (Yunnan); 6: *L. paeta* (Prague); 7: *L. corrodens* (USA); 8: *L. brunnea*  
87 (USA); 9: *L. rufa* (USA); 10: *L. mendax* (Jiangsu); 11: *L. pearmani* (USA); CK:  
88 Negative control)

89 **Figure S11** The sensitivity estimation of species-specific primers with different  
90 concentration of template DNA of *L. bostrychophila* (M: DNA Marker II; 1: 40ng; 2:  
91 20ng; 3: 10ng; 4: 1ng; 5: 0.1ng; 6: 0.01ng; 7:0.001 ng; 8: Negative control)

92 **Figure S12** The sensitivity estimation of species-specific primers with different

93 concentration of template DNA of *L. entomophila* (M: D2000 DNA Marker; 1: 40ng;  
94 2: 20ng; 3: 10ng; 4: 1ng; 5: 0.1ng; 6: 0.01ng; 7:0.001 ng; 8: Negative control)

95 **Figure S13** The sensitivity estimation of species-specific primers with different  
96 concentration of template DNA of *L. decolor* (M: D2000 DNA Marker; 1: 40ng; 2:  
97 20ng; 3: 10ng; 4: 1ng; 5: 0.1ng; 6: 0.01ng; 7:0.001 ng; 8: Negative control)

98 **Figure S14** The sensitivity estimation of species-specific primers with different  
99 concentration of template DNA of *L. paeta* (M: D2000 DNA Marker; 1: 40ng; 2: 20ng;  
100 3: 10ng; 4: 1ng; 5: 0.1ng; 6: 0.01ng; 7:0.001 ng; 8: Negative control)

101 **Figure S15** The sensitivity estimation of species-specific primers with different  
102 concentration of template DNA of *L. corrodens* (M: D2000 DNA Marker; 1: 40ng; 2:  
103 20ng; 3: 10ng; 4: 1ng; 5: 0.1ng; 6: 0.01ng; 7:0.001 ng; 8: Negative control)

104 **Figure S16** The sensitivity estimation of species-specific primers with different  
105 concentration of template DNA of *L. brunnea* (M: D2000 DNA Marker; 1: 40ng; 2:  
106 20ng; 3: 10ng; 4: 1ng; 5: 0.1ng; 6: 0.01ng; 7:0.001 ng; 8: Negative control)

107 **Figure S17** The sensitivity estimation of species-specific primers with different  
108 concentration of template DNA of *L. rufa* (M: D2000 DNA Marker; 1: 40ng; 2: 20ng;  
109 3: 10ng; 4: 1ng; 5: 0.1ng; 6: 0.01ng; 7:0.001 ng; 8: Negative control)

110 **Figure S18** The sensitivity estimation of species-specific primers with different  
111 concentration of template DNA of *L. pearmani* (M: D2000 DNA Marker; 1: 40ng; 2:  
112 20ng; 3: 10ng; 4: 1ng; 5: 0.1ng; 6: 0.01ng; 7:0.001 ng; 8: Negative control)

113 **Figure S19** The sensitivity estimation of species-specific primers with different  
114 concentration of template DNA of *L. mendax* (M: D2000 DNA Marker; 1: 40ng; 2:

115 20ng; 3: 10ng; 4: 1ng; 5: 0.1ng; 6: 0.01ng; 7:0.001 ng; 8: Negative control)

116 **Figure S20** The sensitivity estimation of species-specific primers with different

117 concentration of template DNA of *L. tricolor* (M: D2000 DNA Marker; 1: 40ng; 2:

118 20ng; 3: 10ng; 4: 1ng; 5: 0.1ng; 6: 0.01ng; 7:0.001 ng; 8: Negative control)

119

120

121 Table S1 The primers for the ITS2 gene amplification of 10 stored-product psocids

| Primer    | 名称                | sequence                    |
|-----------|-------------------|-----------------------------|
| ITS2 rDNA | Upstream primer   | 5'- TGTGAACTGCAGGACACATG-3' |
| ITS2 rDNA | Downstream primer | 5'- GTCTTGCCTGCTCTGAG-3'    |
| ITS2 rDNA | Downstream primer | 5'-GTCTTGTCTGATCTGAG-3'     |

122



123 **Table S2** The ITS2 gene sequence of 10 stored-product psocids

124 (1) *L. entomophila*

125 AACATCGATATTTCGAACGCACATTGCTGGGTAGGATTCATTCCGGCCCAACGTCTG  
126 TCTGAGGGTTCGGTGATCAATATTAACCGAACGTTCCGTGTGATACGGAACGTGATGGG  
127 AAGCTCGAAGTAAGTCGATTTCCGAAACGTAGAAAAATGACGGGTAGAGGAAAGAAA  
128 AAGCGAGTGCACGCACAAATTACAGAGTTCGGAAGAACTGTGCTTGCAGTGGTTACA  
129 TTTTAAACGTCACGTTAGTAAGCGTAAAACCTTACCACGGACGTATAAAAGAACAACG  
130 AATTCTATATCTACTCTTCATCGTC

131

132 (2) *L. bostrychophila*

133 AACATCGATATTTCGAACGCACATTGCCGAGCTAGGATTTTTTCCGGCTCGACGTCTG  
134 TCTGAGGGTTCGATAATTTTTATTAAAATAAAGTTTTTCGTTGAGAATAAAATCTCACGGAC  
135 TGTGGAAGTGTGCGAAAGATTTGAGTTTTGCTCGAACTTCGTCTTCTGAAAGTTAAGA  
136 ACGAGAATACAAGGAGCGAGCTCGTATTTTGC GGTTTTCTGCTTACGTTAGTTTTGT  
137 TTTACTGAGCGGATTGTCAGAAAAATCGTAAGAGTTCCTTTTGTAATCTTTTCATCGTC

138

139 (3) *L. decolor*

140 AACATCGATATTTCGAACGCACATTGCGCTCTGGGGAACCTCCGTTCCCGGAGCACGTCT  
141 GTCTGAGGGTTCGGTGCTTAAATATAAATTTCCGGAACGATTCTTTTTAACGGAAGGTCGT  
142 GATCGAAACGTTGAAAGCTTCCGGGTCGTAAGAAAACCCGCTTTTCGAAATGCACTAG  
143 AACCGAGAATCTTCGTAAATGAAGAAGGCGAGAGCTGTAAAGAGCAGCGATACGTGA  
144 ATCACGTTTACCGACAGGCGAACGATAACAAGCATGCCCTAAGCACGTCTTGTAATAAAA  
145 AAGATTCGAATGCATCGCATCGATCTTTACTCGTCACGTTCAATATATATATAAGTAAC  
146 GGGCGAGAGTGCTTTAGGGGAAGCGGTTTCGCATATATTTTTATAACTGTCGTATACGG  
147 GAAACGATGATCGCTAAGCTCGTTTAAAATAATTTTTTTTTGCCCCTCGTCTTTTTTTTCGAA  
148 ACGAAAAAGATTCTTTTCATCGTC

149

150 (4) *L. paeta*

151 AACATCGATATTTTCGAACGCACATTGCCGAGTTTTGGATTTATCCTGACTCGACGTCT  
152 GTCTGAGGGTTCGGTGATATCTATTGAAAGATATTTTCGTTGTTTACCGACGATTTTGAGAG  
153 TGTCAGATTCTGCATTGCAGAAATTTGTCTTTTGAAATACGATGTCACGAGGTTCTTGCA  
154 AAAGGGTAACTGCATCGGACGGTATTTGGTGTCCAATGCTTTTCGACTTTTCGGAGGTC  
155 ACGTTAGTATGATTTTACGAAACGGATTTGGAAAGTCGAGATATTTGCAAAATCTCATCA  
156 TCGTC

157

158 (5) *L. corrodens*

159 AACATCGATATTTCGAACGCACATTGCCGAGCTAGGATTTTTTCCGGCTCGACGTCTGT  
160 CTGAGGGTTCGATGATTTCTAATAAACAGATTTTCCGTTAGAGTCAATCTATGGAAAAATT

161 GAAAGCCTCGAATTATGTATAATAATTCGTCTTTCGAAATAAAATGTACCCGAGGAAAT  
162 CTCA CAAGACGAAAGCAAATTTGTGGCAAATGAATATAGGACGATATATATCGTCTTT  
163 GCTGCAAAAACGGTTTCTCTGCGTCACGTTAGTATTAATACCAAACGGATTGTAGAGA  
164 ACTGTATTATTGTGAGGATTCTCTTCATCGTC

165

166 (6) *L. brunnea*

167 AACATCGATATTTCGAACGCACATTGCGCTCTGGGGAACCTCCGTTCCCGGAGCACGTCT  
168 GTCTGAGGGTTCGATGCTTACTTGTA AAAATTTAGAACGCTGGTTATTTTTTTTCGAATCGC  
169 AAACGATTGAAAAAAAATCTTTTTAACGGCGTGATAAAATGATGAAAGCTTCGGGT  
170 CGCTCTCCGCGTAAGCGGAGGGTTCGCTCTTTCGAAATGCACGATCCCGAGATATCGCT  
171 CGGAAATAAAACGAGTTCGAAGAAGACCGATACGTATAATAGTCTCGAGCCGCCAGCG  
172 GCGAAAGCGATCACGTCTTGTTTTTTTTACGTGCCCGCGATACGATGCGTTTTGAACCG  
173 AGATCCTTGTTACGAATGCACAAACGTAATAATAATAAAGGATCGAAGAAGGTCTT  
174 CCTCTCGTCACGTTAGTGGTTATTTTGATATGTAACGTGAAACGGTCGAGATGGAAAAC  
175 GTATCGCGGGTAAAGACGAGAAAAAGAGGAGGCTTTCGAACCGTGTTTTTATCGCGGC  
176 TCTCGAAACGAAGATCGGTTTTTCGTGTACAAGCGTTTTGTTAGTAGTACTCGTAAAC  
177 AGAATTCGGCGATTTCTTTTCATCGTC

178

179 (7) *L. rufa*

180 AACATCGATATTTCGAACGCACATTGCGCTCTGGGGAACCTCCGTTCCCGGAGCACGTCT  
181 GTCTGAGGGTTCGGTGCTTAATGTTAAATGTCGGAACGCTTGACGGCGTGATCGAAAC  
182 GTTGAAAGCTTCGGGTTCGTGAAAATTAAGACCCGTCTTTCCAAATGCACGAAAGACCG  
183 AGAATCTTATGAGGAAGAAGAACTATAGAGAACGATACGTCAATCTCACGGCTGCT  
184 CGTAAAGCAAATTAAGTACATTAGCGTACCGATAGGTCGTAAATTTTTTTTTAAAG  
185 CGAGCCCGTAAAGTAAACGAAAAAGAAAAGATCGCACGCATCGTCGATCTTCCTCG  
186 TCACGTTTCATGATGATACATAGCAAATAAATAAATAAAGAAAAACGGTCGAGGGTACT  
187 GCGGGGATTCGGTATAGCGTGAGGAAACGAAAATCGTTACTCGTCGAAATTGTGTTTTT  
188 TATTTTTTTTTTACCTCAAGAAAAGATTCTTTTCATCGTC

189

190 (8) *L. pearmani*

191 AACATCGATATTTCGAACGCACATTGCGCTCTGGGGAACCTCCGTTCCCGGAGCACGTCT  
192 GTCTGAGGGTTCGATGCTTAATTGTA AAAATCTAGAACGCCGTCTCTCGCACGATTAAGTT  
193 CGGGGGGAGCGGTTCGTGATAAAAGACTCCGTTGAATGCTTCGAGCTCGCGAGAGCCC  
194 GTCATTCCAAATGCACGAAACGAGATTCTCACAAGAATTTCGAACGAGTCGGAAGAT  
195 GAGAGAAACGATACGTAAATCGTACTTGCTATCTACGGAAGCCAATATTGCCCCGTGAT  
196 ACGAAACATGTCTTCCTCGTCACGTTAGTCAGTTTGTAAATAATAAGCAAAAATAACGGG  
197 CGAGACGTTGATGTATCGCCGCGGCGGCTAGCAGTAGATCGTACGGAACGAAAATCG  
198 TTTACTCGTTTGAAGAATGGTAGCCGTTTTCGTTGGTAGCCTTTCGACCAAACCGAA  
199 GTGAGATTCTTTTCATCGTC

200

201 (9) *L. mendax*

202 AACATCGATATTTTCGAACGCACATTGCGGTCCTTGGAACCTTTGTTCCCGGACCACGTCT

203 GTCTGAGGGTCGGTGTGCTATTAGAACATTTTTTATTCGTTTCGCTTCGGCACGAA

204 TAATGTGGAGGTTTCGAGTATCGGCTCGTCTTCCTAAACAGAATAATGCGAGAATTCCG

205 TAAGCGGGAATTTATGGGTTTTGTCCTCGCGTCACGTTTCTGAAATTAAGAGCAGCGT

206 TGACGGACTTGCGAGGTAAAGCTCTGTTTCGGCGAAATAGACGGAAATTCTAATTCATC

207 GTC

208

209 (10) *L. tricolor*

210 AACATCGATATTTTCGAACGCACATTGCCGAACTTTGAATTTATTCTGGTTCGACGTCT

211 GTCTGAGGGTCGATGAAAATTATTGAAATATTTACCGTTAGATGTAATGTCTACGGTTAT

212 TGAAAGTTACGAATTTCTCGGAAATTCGTCTTTCGAAATTCATATGTCCCCGAGAATC

213 GTACATGAAAGAGAATGTCTCAGTAAATGGTATGTTATTTGCTGCATTGGGCATATTTCT

214 GCTTCACGTTAGTAACCAAACGGATAGTAGAAAAATGTCTTCGTGGAACGATTTCTC

215 ATCTTCGTCTCAGATCAGGAATCACTAGTGAATTCGCGGCCGCCTGCAGGTC

216

| Population                                | Locations                  | Authors                | No. GenBank |
|-------------------------------------------|----------------------------|------------------------|-------------|
| <i>L. entomophila</i> _BJ- P. R. China    | Beijing,P. R.China         | Cui Bingyi, Li Zhihong | KC707588    |
| <i>L. entomophila</i> _HuB- P. R. China   | HuBei,P. R. China          | Cui Bingyi, Li Zhihong | KC707590    |
| <i>L. entomophila</i> _GX- P. R. China    | Guangxi,P. R.China         | Cui Bingyi, Li Zhihong | KC707589    |
| <i>L. entomophila</i> _SD- P. R. China    | Shandong,P. R.China        | Cui Bingyi, Li Zhihong | KC707591    |
| <i>L. bostrychophila</i> _BJ- P. R. China | Beijing,P. R.China         | Cui Bingyi, Li Zhihong | JQ966091    |
| <i>L. bostrychophila</i> _GX- P. R. China | Guangxi,P. R.China         | Cui Bingyi, Li Zhihong | JQ966093    |
| <i>L. bostrychophila</i> _GZ- P. R. China | Guangzhou,P.R.China        | Cui Bingyi, Li Zhihong | JQ966096    |
| <i>L.bostrychophila</i> _HeN- P. R. China | Henan,P. R.China           | Cui Bingyi, Li Zhihong | JQ966097    |
| <i>L. bostrychophila</i> _CQ- P. R. China | Chongqing,P. R.China       | Cui Bingyi, Li Zhihong | JQ966099    |
| <i>L. bostrychophila</i> _P-CZ            | Prague,CZ                  | Cui Bingyi, Li Zhihong | JQ966092    |
| <i>L. bostrychophila</i> _CZ              | Central Bohemia, CZ        | Cui Bingyi, Li Zhihong | JQ966095    |
| <i>L. bostrychophila</i> _USA             | Manhattan,USA              | Cui Bingyi, Li Zhihong | JQ966094    |
| <i>L. bostrychophila</i> _GER             | Berlin ,GER                | Cui Bingyi, Li Zhihong | JQ966098    |
| <i>L. decolor</i> _CQ- P. R. China        | Chongqing,P. R.China       | Cui Bingyi, Li Zhihong | KC707592    |
| <i>L. decolor</i> _YN- P. R. China        | Yunnan, P. R.China         | Cui Bingyi, Li Zhihong | KC707593    |
| <i>L. decolor</i> _P-CZ                   | Prague,CZ                  | Cui Bingyi, Li Zhihong | KC707594    |
| <i>L. decolor</i> _P-CZ                   | Prague,CZ                  | Cui Bingyi, Li Zhihong | KC707595    |
| <i>L. decolor</i> _P-CZ                   | Prague,CZ                  | Cui Bingyi, Li Zhihong | KC707596    |
| <i>L. decolor</i> _USA                    | USA                        | Cui Bingyi, Li Zhihong | KC707597    |
| <i>L. decolor</i> _USA                    | USA                        | Cui Bingyi, Li Zhihong | KC707598    |
| <i>L. decolor</i> _USA                    | USA                        | Cui Bingyi, Li Zhihong | KC707599    |
| <i>L. paeta</i> _USA                      | USA                        | Cui Bingyi, Li Zhihong | GU563533    |
| <i>L. paeta</i> _HeB-P. R.China           | Hebei,P.R.China            | Cui Bingyi, Li Zhihong | KC707604    |
| <i>L. paeta</i> _SDT-P. R.China           | Taian,Shandong,P.R.China   | Cui Bingyi, Li Zhihong | KC707605    |
| <i>L. paeta</i> _SDT-P. R.China           | Taian,Shandong,P.R.China   | Cui Bingyi, Li Zhihong | KC707606    |
| <i>L. paeta</i> _SDT-P. R.China           | Taian,Shandong,P.R.China   | Cui Bingyi, Li Zhihong | KC707607    |
| <i>L. paeta</i> _SDC-P. R.China           | Caoxian,Shandong,P.R.China | Cui Bingyi, Li Zhihong | KC707619    |
| <i>L. paeta</i> _ZJ-P. R.China            | Zhejiang,P. R.China        | Cui Bingyi, Li Zhihong | KC707612    |
| <i>L. paeta</i> _ZJ-P. R.China            | Zhejiang,P. R.China        | Cui Bingyi, Li Zhihong | KC707613    |
| <i>L. paeta</i> _HuB-P. R.China           | Hubei,P. R.China           | Cui Bingyi, Li Zhihong | KC707614    |
| <i>L. paeta</i> _HuB-P. R.China           | Hubei,P. R.China           | Cui Bingyi, Li Zhihong | KC707615    |
| <i>L. paeta</i> _HeN-P. R.China           | Henan,P. R.China           | Cui Bingyi, Li Zhihong | KC707616    |
| <i>L. paeta</i> _HeN-P. R.China           | Henan,P. R.China           | Cui Bingyi, Li Zhihong | KC707617    |
| <i>L. paeta</i> _HeN-P. R.China           | Henan,P. R.China           | Cui Bingyi, Li Zhihong | KC707618    |
| <i>L. paeta</i> _CZ                       | Prague,CZ                  | Cui Bingyi, Li Zhihong | KC707603    |

|                                    |                     |                        |          |
|------------------------------------|---------------------|------------------------|----------|
| <i>L. paeta</i> _USA               | USA                 | Cui Bingyi, Li Zhihong | KC707608 |
| <i>L. paeta</i> _USA               | USA                 | Cui Bingyi, Li Zhihong | KC707609 |
| <i>L. paeta</i> _USA               | USA                 | Cui Bingyi, Li Zhihong | KC707610 |
| <i>L. paeta</i> _USA               | USA                 | Cui Bingyi, Li Zhihong | KC707611 |
| <i>L. corrodens</i> _CZ            | Prague,CZ           | Cui Bingyi, Li Zhihong | KC707623 |
| <i>L. corrodens</i> _DMK.          | Danmark             | Cui Bingyi, Li Zhihong | KC707620 |
| <i>L. corrodens</i> _DMK.          | Danmark             | Cui Bingyi, Li Zhihong | KC707621 |
| <i>L. corrodens</i> _DMK.          | Danmark             | Cui Bingyi, Li Zhihong | KC707622 |
| <i>L. corrodens</i> _USA           | USA                 | Cui Bingyi, Li Zhihong | KC707624 |
| <i>L. corrodens</i> _USA           | USA                 | Cui Bingyi, Li Zhihong | KC707625 |
| <i>L. brunnea</i> _P-CZ            | Prague,CZ           | Cui Bingyi, Li Zhihong | KC707626 |
| <i>L. brunnea</i> _USA             | USA                 | Cui Bingyi, Li Zhihong | KC707626 |
| <i>L. mendax</i> _JS-P. R. China   | Jiangsu,P. R.China  | Cui Bingyi, Li Zhihong | KC707629 |
| <i>L. pearmani</i> _USA            | USA                 | Cui Bingyi, Li Zhihong | KC707628 |
| <i>L. tricolor</i> _SD-P. R. China | Shandong,P. R.China | Cui Bingyi, Li Zhihong | KC707630 |
| <i>L. tricolor</i> _SD-P. R. China | Shandong,P. R.China | Cui Bingyi, Li Zhihong | KC707631 |
| <i>L. tricolor</i> _SD-P. R. China | Shandong,P. R.China | Cui Bingyi, Li Zhihong | KC707632 |
| <i>L. rufa</i> _USA                | USA                 | Cui Bingyi, Li Zhihong | KC707629 |

---

218

219

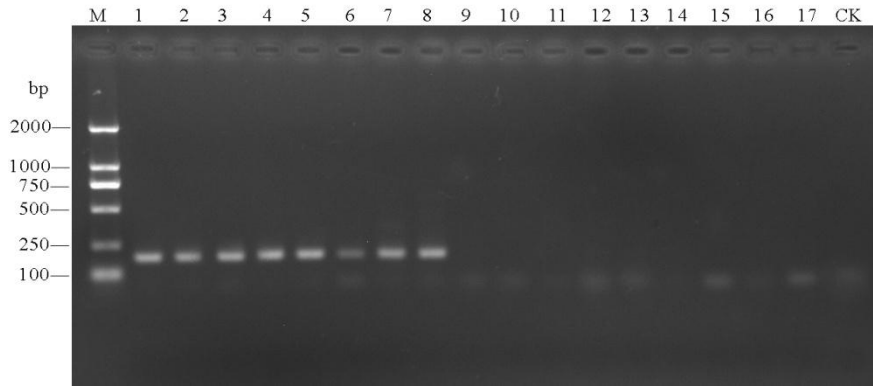

220

221 **Figure S1** The electrophoresis strip for specificity estimation of species-specific primers (LBF and LBR) of *L.*  
 222 *bostrychophila* (M: D2000 DNA Marker; 1: *L. bostrychophila* (Guangxi); 2: *L. bostrychophila* (Henan); 3: *L.*  
 223 *bostrychophila* (Chongqing); 4: *L. bostrychophila* (Berlin); 5: *L. bostrychophila* (USA); 6: *L. bostrychophila*  
 224 (Prague); 7 *L. bostrychophila* (Beijing); 8: *L. bostrychophila* (Guangzhou); 9: *L. Entomophila* (Shandong); 10: *L.*  
 225 *Decolor* (Yunnan); 11: *L. paeta* (Zhejiang); 12: *L. corrodens* (USA); 13: *L. Brunnea* (Prague); 14: *L. Rufa* (USA);  
 226 15: *L. Pearmani* (USA); 16: *L. mendax* (Jiangsu); 17: *L. Tricolor* (Shandong); CK: Negative control)

227

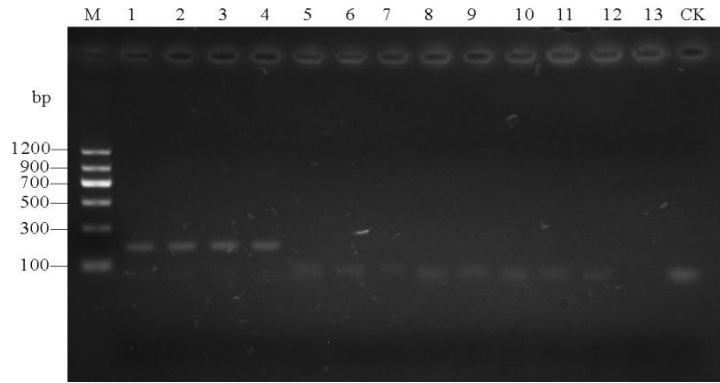

228

229 **Figure S2** The electrophoresis strip for specificity estimation of species-specific primers (21LEnF and 208LEnR-2)  
 230 of *L. Entomophila* (M: DNA Marker II; 1: *L. entomophila* (Beijing); 2: *L. entomophila* (Guangxi); 3: *L.*  
 231 *entomophila* (Prague); 4: *L. entomophila* (Chongqing); 5: *L. bostrychophila* (Guangxi); 6: *L. bostrychophila*  
 232 (Yunnan); 7: *L. Decolor* (Yunnan); 8: *L. corrodens* (USA); 9: *L. brunnea* (Prague); 10: *L. rufa* (USA); 11: *L.*  
 233 *pearmani* (USA); 12: *L. mendax* (Jiangsu); 13: *L. tricolor*(Shandong); CK: Negative control)

234

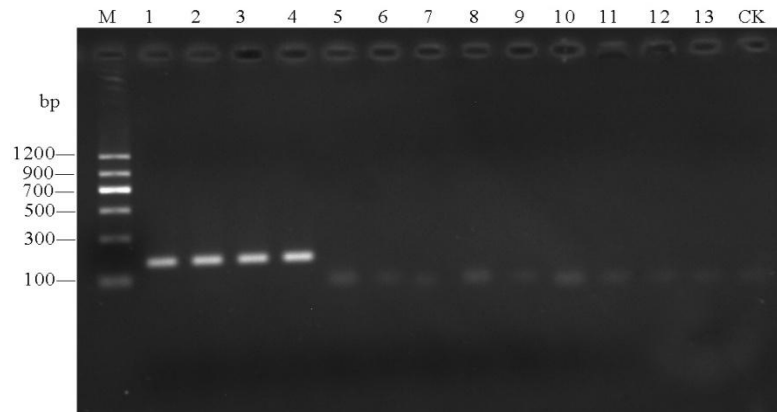

235

236 **Figure S3** The electrophoresis strip for specificity estimation of species-specific primers (164LDeF and 319LDeR)

237 of *L. decolor* (M: DNA Marker II; 1 and 2: *L. Decolor* (Yunnan); 3 and 4: *L. Decolor* (Chongqing); 5: *L.*

238 *Entomophila* (Shandong); 6: *L. bostrychophila* (Chongqing); 7: *L. paeta* (Shandong); 8: *L. corrodens* (USA); 9: *L.*

239 *Brunnea* (Prague); 10: *L. Rufa* (USA); 11: *L. mendax* (Jiangsu); 12: *L. Pearmani* (USA); 13: *L. Tricolor*

240 (Shandong); CK: Negative control)

241



242

243

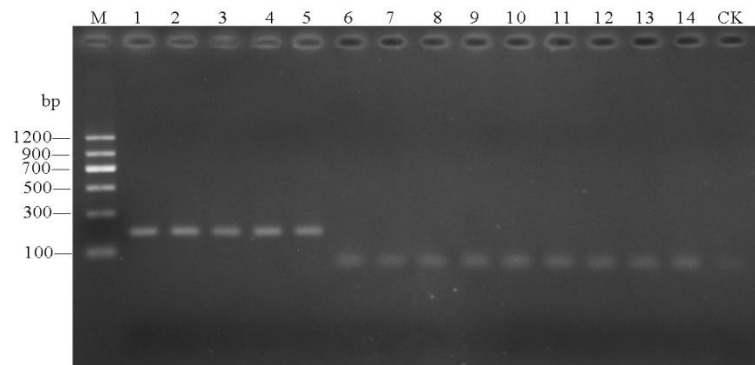

244

245 **Figure S4** The electrophoresis strip for specificity estimation of species-specific primers (LPa15F and LPa180R)

246 of *L. paeta* (M: DNA Marker II; 1: *L. paeta* (Caoxian, Shandong); 2: *L. paeta* (Taian, Shandong); 3: *L.*

247 *paeta*(Zhejiang); 4: *L. paeta* (Hubei); 5: *L. paeta* (USA); 6: *L. entomophila* (Shandong); 7: *L. bostrychophila*

248 (Guangxi); 8: *L. decolor* (Yunnan); 9: *L. corrodens* (Prague); 10: *L. brunnea* (USA); 11: *L. Rufa* (USA); 12: *L.*

249 *pearmani* (USA); 13: *L. mendax* (Jiangsu); 14: *L. tricolor* (Shandong); CK: Negative control)

250

251

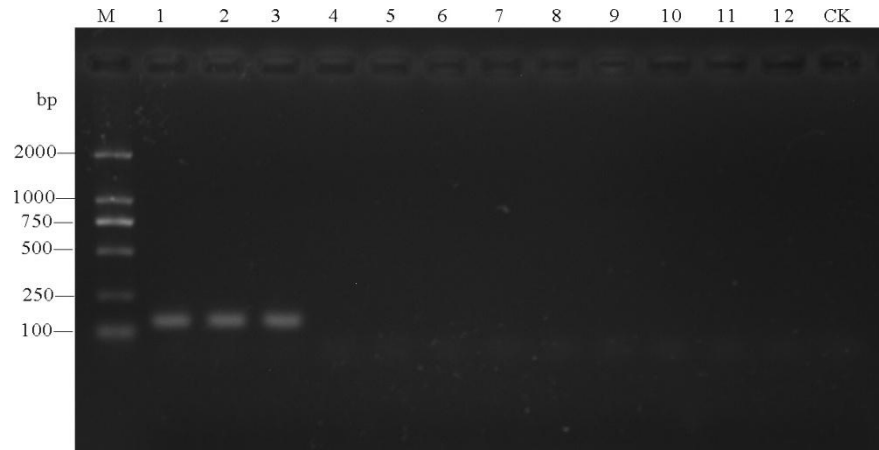

252

253

254 **Figure S5** The electrophoresis strip for specificity estimation of species-specific primers (LC170F and LC277R)

255 of *L. corrodens* (M: D2000 DNA Marker; 1: *L. corrodens* (Denmark); 2: *L. corrodens* (Prague); 3: *L. corrodens*

256 (USA); 4: *L. entomophila* (Shandong); 5: *L. bostrychophila* (Guangzhou); 6: *L. decolor* (Chongqing); 7: *L. paeta*

257 (Hubei); 8: *L. brunnea* (USA); 9: *L. rufa* (USA); 10: *L. tricolor* (Shandong); 11: 11: *L. mendax* (Jiangsu); 12: *L.*

258 *pearmani* (USA); CK: Negative control)

259

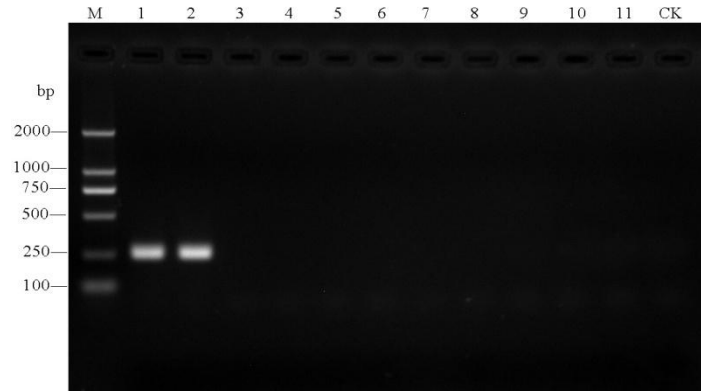

260

261

262 **Figure S6** The electrophoresis strip for specificity estimation of species-specific primers (LBr350F and LBr577R)

263 of *L. brunnea* (M: D2000 DNA Marker; 1: *L. brunnea* (Prague); 2: *L. brunnea* (USA); 3: *L. entomophila* (Beijiing);

264 4: *L. bostrychophila* (Guangzhou); 5: *L. decolor* (USA); 6: *L. paeta* (Shandong); 7: *L. corrodens* (USA); 8: *L. rufa*

265 (USA); 9: *L. pearmani* (USA); 10: *L. tricolor* (Shandong); 11: *L. mendax* (Jiangsu); CK: Negative control)

266

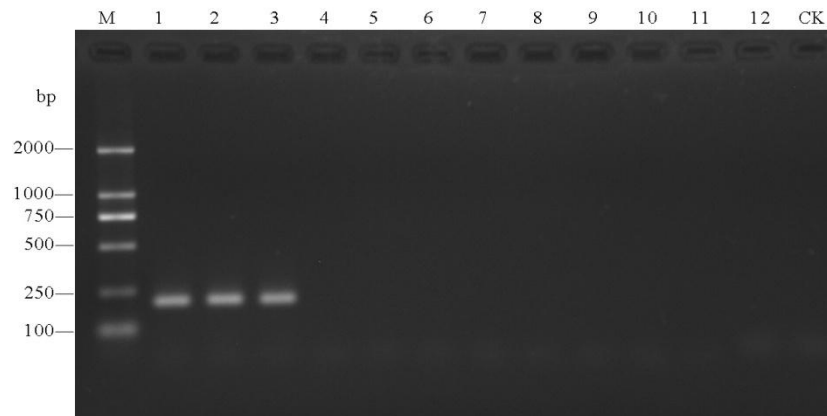

268

269

270 **Figure S7** The electrophoresis strip for specificity estimation of species-specific primers (78LRuF-3 and  
271 276LRuR-3) of *L. rufa* (M: D2000 DNA Marker II; 1, 2, and 3: *L. rufa* (USA); 4: *L. entomophila* (Beijing); 5: *L.*  
272 *bostrychophila* (Guangxi); 6: *L. decolor* (Yunnan); 7: *L. paeta* (Prague); 8: *L. corrodens* (USA); 9: *L. brunnea*  
273 (USA); 10: *L. mendax* (Jiangsu); 11: *L. pearmani* (USA); 12: *L. tricolor* (Shandong); CK: Negative control)  
274

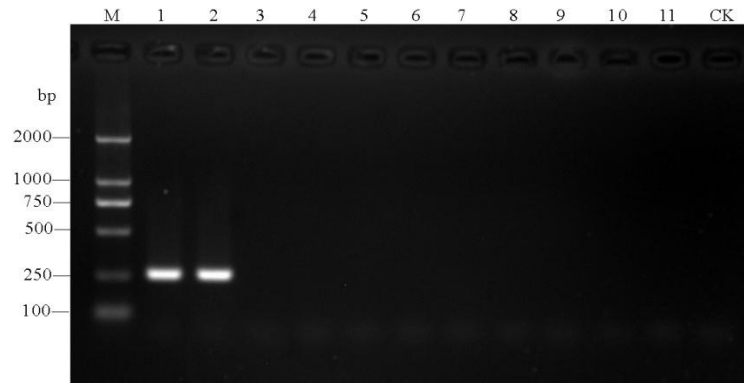

275

276

277 **Figure S8** The electrophoresis strip for specificity estimation of species-specific primers (186LPeF and 436LPeR)

278 of *L. pearmani* (M: D2000 DNA Marker; 1 and 2: *L. pearmani*(USA); 3: *L. entomophila* (Beijiing); 4: *L.*

279 *bostrychophila* (Guangxi); 5: *L. decolor* (Yunnan); 6: *L. paeta* (Prague); 7: *L. corrodens* (USA); 8: *L. brunnea*

280 (USA); 9: *L. rufa* (USA); 10: *L. mendax* (Jiangsu); 11: *L. tricolor* (Shandong); CK: Negative control)

281

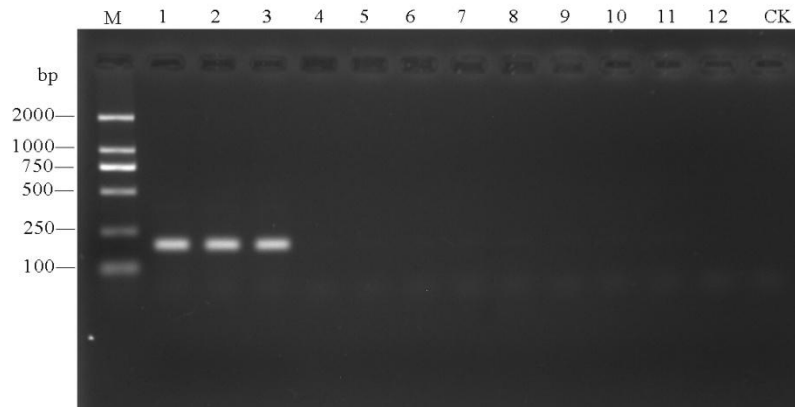

282

283

284 **Figure S9** The electrophoresis strip for specificity estimation of species-specific primers (LM60F and LM224R)

285 of *L. mendax* (M: D2000 DNA Marker; 1 and 2: *L. mendax* (Jiangsu); 3: *L. entomophila* (Beijing); 4: *L.*

286 *bostrychophila* (Guangxi); 5: *L. decolor* (Yunnan); 6: *L. paeta* (Prague); 7: *L. corrodens* (USA); 8: *L. brunnea*

287 (USA); 9: *L. rufa* (USA); 10: *L. pearmani* (USA); 11: *L. tricolor* (Shandong); CK: Negative control)

288

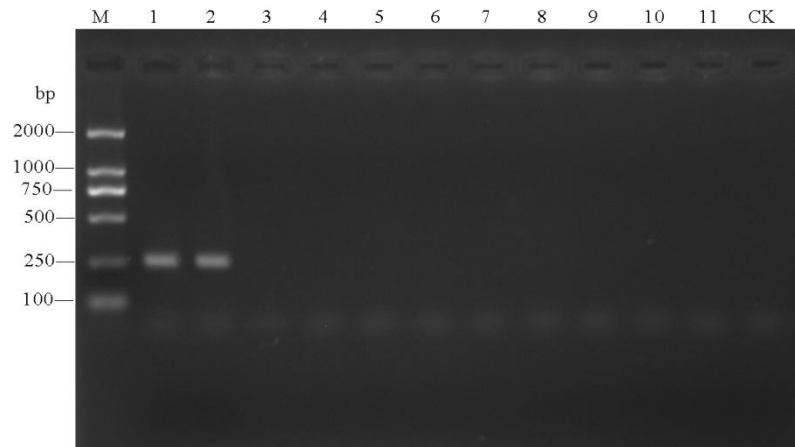

289

290

291 **Figure S10** The electrophoresis strip for specificity estimation of species-specific primers (LTri20F and LTri249R)

292 of *L. tricolor* (M: D2000 DNA Marker; 1 and 2: *L. tricolor* (Shandong); 3: *L. entomophila* (Beijiing); 4: *L.*

293 *bostrychophila* (Guangxi); 5: *L. decolor* (Yunnan); 6: *L. paeta* (Prague); 7: *L. corrodens* (USA); 8: *L. brunnea*

294 (USA); 9: *L. rufa* (USA); 10: *L. mendax* (Jiangsu); 11: *L. pearmani* (USA); CK: Negative control)

295

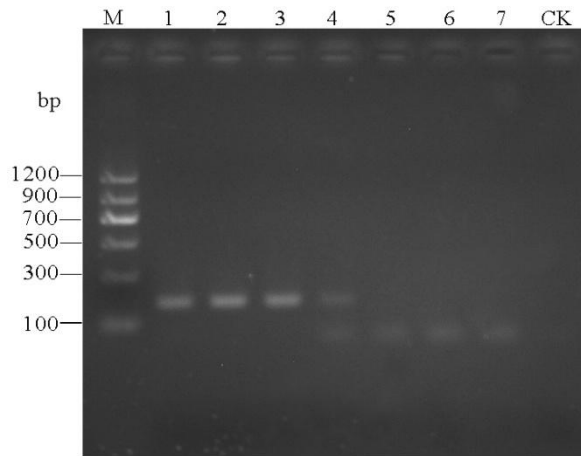

296

297

298 **Figure S11** The sensitivity estimation of species-specific primers with different concentration of template DNA of

299 *L. bostrychophila* (M: DNA Marker II; 1: 40ng; 2: 20ng; 3: 10ng; 4: 1ng; 5: 0.1ng; 6: 0.01ng; 7:0.001 ng; 8:

300

Negative control)

301

302

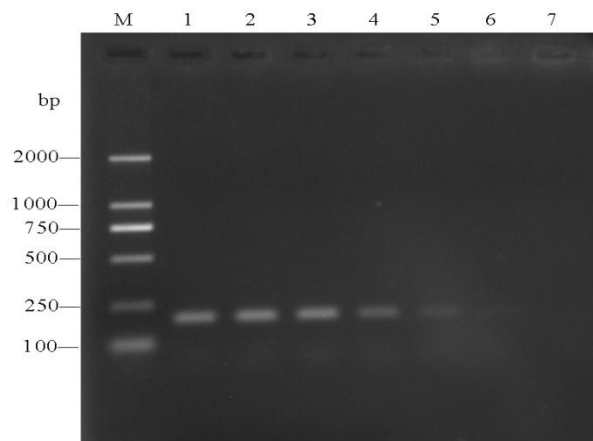

303

304 **Figure S12** The sensitivity estimation of species-specific primers with different concentration of template

305 DNA of *L. entomophila* (M: D2000 DNA Marker; 1: 40ng; 2: 20ng; 3: 10ng; 4: 1ng; 5: 0.1ng; 6: 0.01ng; 7:0.001

306

ng; 8: Negative control)

307

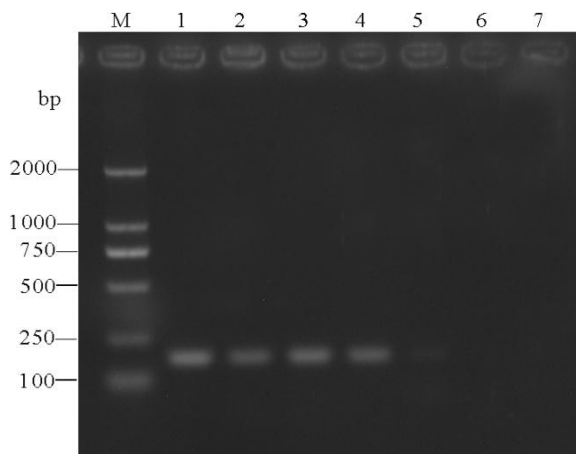

308



309 **Figure S13** The sensitivity estimation of species-specific primers with different concentration of template  
310 DNA of *L. decolor* (M: D2000 DNA Marker; 1: 40ng; 2: 20ng; 3: 10ng; 4: 1ng; 5: 0.1ng; 6: 0.01ng; 7:0.001 ng; 8:  
311 Negative control)

312

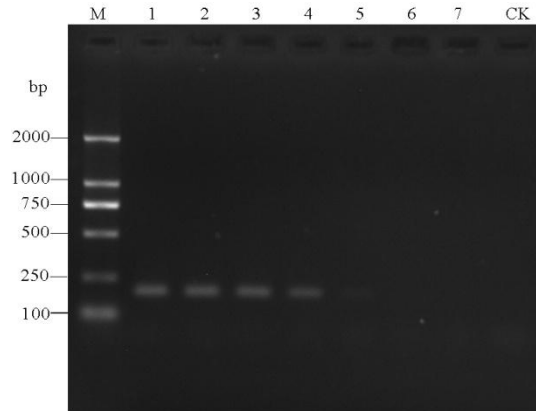

313

314

315 **Figure S14** The sensitivity estimation of species-specific primers with different concentration of template  
316 DNA of *L. paeta* (M: D2000 DNA Marker; 1: 40ng; 2: 20ng; 3: 10ng; 4: 1ng; 5: 0.1ng; 6: 0.01ng; 7:0.001 ng; 8:  
317 Negative control)

318

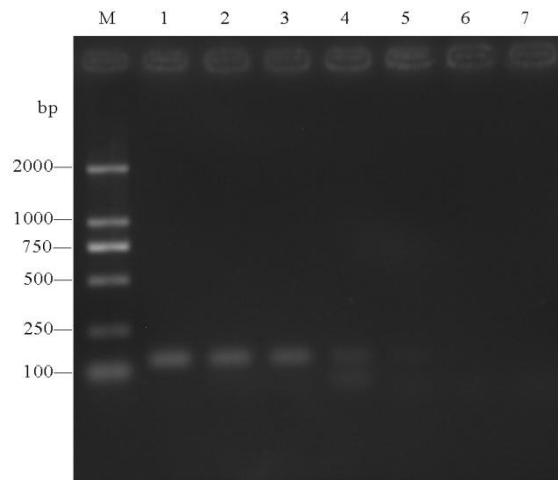

319

320 **Figure S15** The sensitivity estimation of species-specific primers with different concentration of template  
321 DNA of *L. corrodens* (M: D2000 DNA Marker; 1: 40ng; 2: 20ng; 3: 10ng; 4: 1ng; 5: 0.1ng; 6: 0.01ng; 7:0.001 ng;  
322 8: Negative control)

323

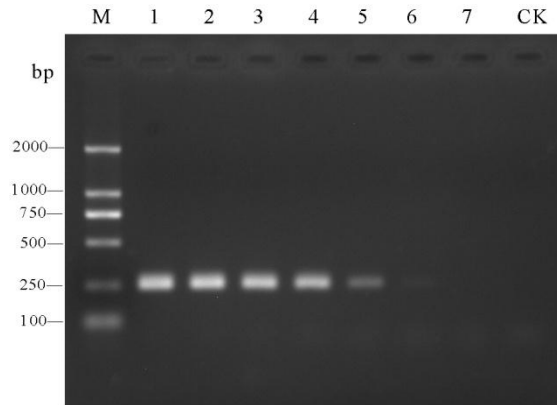

324

325 **Figure S16** The sensitivity estimation of species-specific primers with different concentration of template  
 326 DNA of *L. brunnea* (M: D2000 DNA Marker; 1: 40ng; 2: 20ng; 3: 10ng; 4: 1ng; 5: 0.1ng; 6: 0.01ng; 7:0.001 ng; 8:  
 327 Negative control)

328

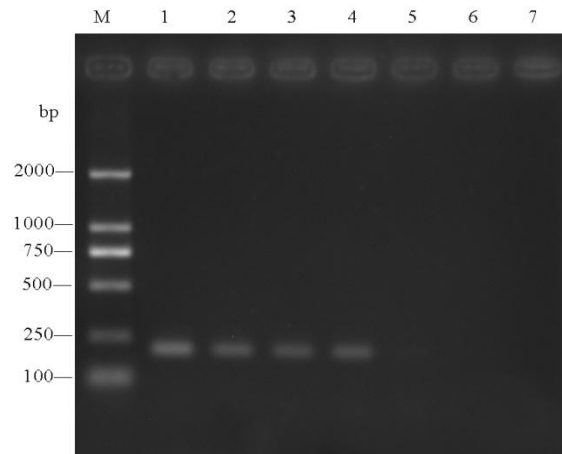

329

330 **Figure S17** The sensitivity estimation of species-specific primers with different concentration of template  
 331 DNA of *L. rufa* (M: D2000 DNA Marker; 1: 40ng; 2: 20ng; 3: 10ng; 4: 1ng; 5: 0.1ng; 6: 0.01ng; 7:0.001 ng; 8:  
 332 Negative control)

333

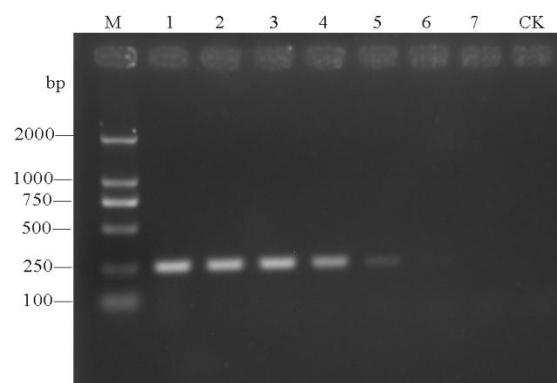

334

335 **Figure S18** The sensitivity estimation of species-specific primers with different concentration of template  
 336 DNA of *L. pearmani* (M: D2000 DNA Marker; 1: 40ng; 2: 20ng; 3: 10ng; 4: 1ng; 5: 0.1ng; 6: 0.01ng; 7:0.001 ng;

337

8: Negative control)

338

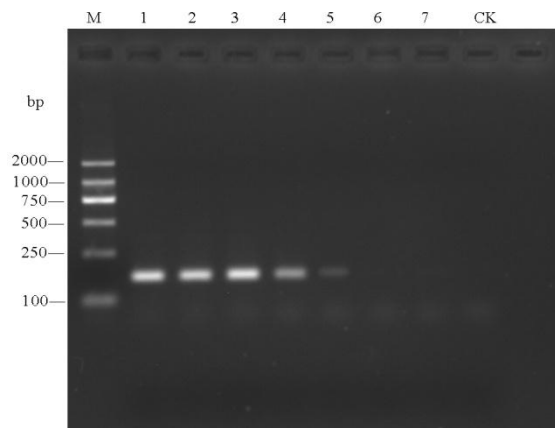

339

340 **Figure S19** The sensitivity estimation of species-specific primers with different concentration of template  
341 DNA of *L. mendax* (M: D2000 DNA Marker; 1: 40ng; 2: 20ng; 3: 10ng; 4: 1ng; 5: 0.1ng; 6: 0.01ng; 7:0.001 ng; 8:  
342 Negative control)

343

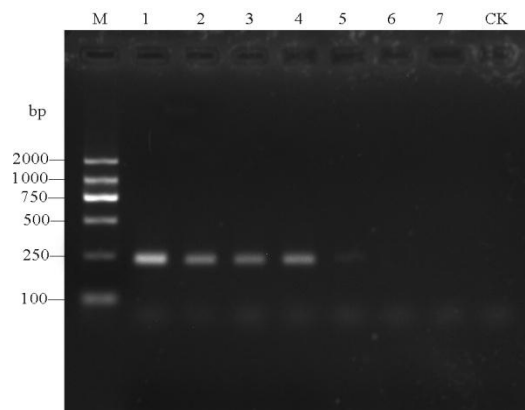

344

345 **Figure S20** The sensitivity estimation of species-specific primers with different concentration of template  
346 DNA of *L. tricolor* (M: D2000 DNA Marker; 1: 40ng; 2: 20ng; 3: 10ng; 4: 1ng; 5: 0.1ng; 6: 0.01ng; 7:0.001 ng; 8:  
347 Negative control)
